# Supplementary material for: The correlation between tumor-associated macrophage infiltration and progression in cervical carcinoma
Source: PubMed Central journal article supplement (PMC8493445; doi:10.1042/bsr20203145), 2021-05-20
Supplement: BSR-2020-3145_supp.pdf [file BSR-2020-3145_supp.pdf]

**Supplementary Table 1 Results of the evaluation of the risk of bias in the included studies**

| <b>Studies</b>      | <b>Appropriateness of the case (1 point)</b> | <b>Representativeness of the case (1 point)</b> | <b>Selection of the control (1 point)</b> | <b>Determination of the control (1 point)</b> | <b>Comparability of the case and the control in the design and statistical analysis (2 points)</b> | <b>Exposure factors (1 point)</b> | <b>The same method to determine exposure factors of the case and control (1 point)</b> | <b>No response rate (1 point)</b> | <b>NOS (9 point)</b> |
|---------------------|----------------------------------------------|-------------------------------------------------|-------------------------------------------|-----------------------------------------------|----------------------------------------------------------------------------------------------------|-----------------------------------|----------------------------------------------------------------------------------------|-----------------------------------|----------------------|
| Chen XJ et al [15]  | 1                                            | 1                                               | 0                                         | 1                                             | 2                                                                                                  | 1                                 | 1                                                                                      | 0                                 | 7                    |
| Chen et al [16]     | 1                                            | 1                                               | 0                                         | 1                                             | 1                                                                                                  | 1                                 | 1                                                                                      | 0                                 | 6                    |
| Yan et al [17]      | 1                                            | 1                                               | 0                                         | 1                                             | 2                                                                                                  | 1                                 | 1                                                                                      | 0                                 | 7                    |
| Liu et al [18]      | 1                                            | 1                                               | 0                                         | 1                                             | 2                                                                                                  | 1                                 | 1                                                                                      | 0                                 | 7                    |
| Wang et al [19]     | 1                                            | 1                                               | 0                                         | 1                                             | 1                                                                                                  | 1                                 | 1                                                                                      | 0                                 | 6                    |
| Li et al [20]       | 1                                            | 1                                               | 0                                         | 1                                             | 1                                                                                                  | 1                                 | 1                                                                                      | 0                                 | 6                    |
| Chen et al [21]     | 1                                            | 1                                               | 0                                         | 1                                             | 2                                                                                                  | 1                                 | 1                                                                                      | 0                                 | 7                    |
| Shen et al [22]     | 1                                            | 1                                               | 0                                         | 1                                             | 2                                                                                                  | 1                                 | 1                                                                                      | 0                                 | 7                    |
| Petrillo et al [23] | 1                                            | 1                                               | 0                                         | 1                                             | 1                                                                                                  | 1                                 | 1                                                                                      | 0                                 | 6                    |
| Ding et al [24]     | 1                                            | 1                                               | 0                                         | 1                                             | 2                                                                                                  | 1                                 | 1                                                                                      | 0                                 | 7                    |
| Liu et al [25]      | 1                                            | 1                                               | 0                                         | 1                                             | 1                                                                                                  | 1                                 | 1                                                                                      | 0                                 | 6                    |
